# Supplementary material for: Gene therapy with SOCS1 for gastric cancer induces G2/M arrest and has an antitumour effect on peritoneal carcinomatosis
Source: PubMed Central journal article supplement — Br J Cancer. 2015 Jul 16;113(3):433–42. doi: 10.1038/bjc.2015.229 (PMC4522636; doi:10.1038/bjc.2015.229), 2015-07-16
Supplement: bjc2015229x1.pdf [file bjc2015229x1.pdf]

23/Jan./2015

**JCRB Cell Bank**

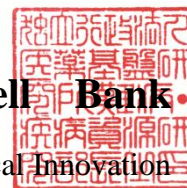

National Institute of Biomedical Innovation

7-6-8 Saito-Asagi, Ibaraki, Osaka, Japan

TEL : +81-72-641-9851

FAX : +81-72-641-9859

## Cell Authentication Report (ST-0064)

Client:

Rie Nakatsuka

Laboratory for Immune Signal, National Institute of  
Biomedical Innovation

TEL : 072-641-9844

E-mail : r-nakatsuka@nibio.go.jp

### Sample Information

-----

Sample Number : 6

- 1) Cell No. : ST-0064\_01 (Cell Name : OKAJIMA)
- 2) Cell No. : ST-0064\_02 (Cell Name : MKN45)
- 3) Cell No. : ST-0064\_03 (Cell Name : AGS)
- 4) Cell No. : ST-0064\_04 (Cell Name : KATO-III)
- 5) Cell No. : ST-0064\_05 (Cell Name : OCUM-1)
- 6) Cell No. : ST-0064\_06 (Cell Name : NUGC-2)

# Peak report (Cell No. : ST-0064\_01)

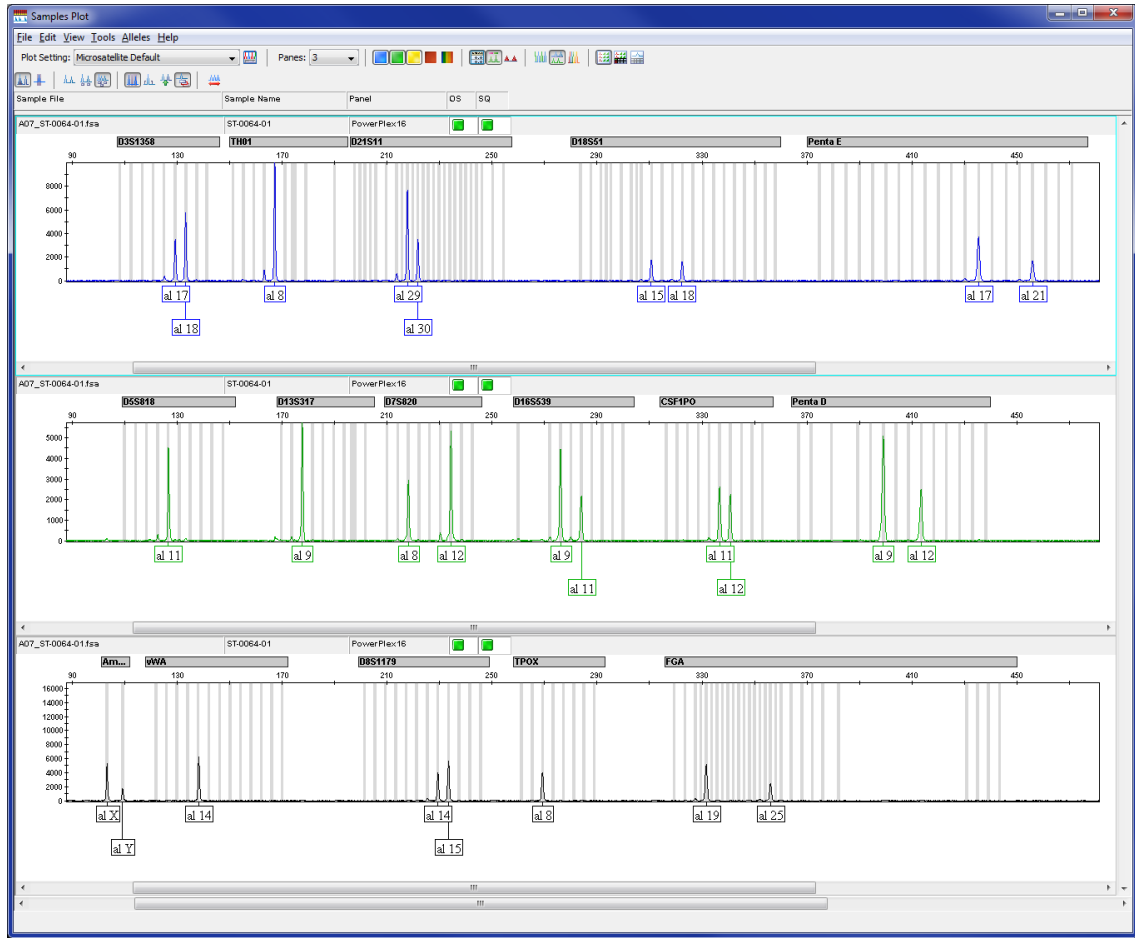

## STR Profile (Cell No. : ST-0064\_01)

|                |                |                |                |                |                |
|----------------|----------------|----------------|----------------|----------------|----------------|
| <b>D3S1358</b> | <b>TH01</b>    | <b>D21S11</b>  | <b>D18S51</b>  | <b>Penta_E</b> |                |
| 17,18          | 8              | 29,30          | 15,18          | 17,21          |                |
| <b>D5S818</b>  | <b>D13S317</b> | <b>D7S820</b>  | <b>D16S539</b> | <b>CSF1PO</b>  | <b>Penta_D</b> |
| 11             | 9              | 8,12           | 9,11           | 11,12          | 9,12           |
| <b>AM</b>      | <b>vWA</b>     | <b>D8S1179</b> | <b>TPOX</b>    | <b>FGA</b>     |                |
| X,Y            | 14             | 14,15          | 8              | 19,25          |                |

## Comparison with database (Cell No. : ST-0064\_01)

| Cell No.          | Cell Name      | Lot No.         | EV           | D5S818    | D13S317  | D7S820      | D16S539     | vWA       | TH01     | AM         | TPOX     | CSF1PO       |
|-------------------|----------------|-----------------|--------------|-----------|----------|-------------|-------------|-----------|----------|------------|----------|--------------|
| <b>ST-0064-01</b> | <b>OKAJIMA</b> | <b>11202014</b> | <b>1.000</b> | <b>11</b> | <b>9</b> | <b>8,12</b> | <b>9,11</b> | <b>14</b> | <b>8</b> | <b>X,Y</b> | <b>8</b> | <b>11,12</b> |
| JCRB0324          | BCNS1 KO       | 09302008        | 0.759        | 11        | 8,9      | 10,12       | 9,11        | 14,17     | 6        | X,Y        | 8,11     | 11,12        |
| JCRB3009          | BCNS1 KO hTERT | 04152008        | 0.759        | 11        | 8,9      | 10,12       | 9,11        | 14,17     | 6        | X,Y        | 8,11     | 11,12        |
| JCRB1463          | KYSE3210       | 03122012        | 0.750        | 11        | 9        | 8,12        | 9           | 14,17     | 9        | X          | 8        | 11           |
| JCRB1218          | UC701          | 10302007        | 0.690        | 10,11     | 9,10     | 8,12        | 10,11       | 16        | 6        | X,Y        | 8,9      | 11,12        |
| JCRB1229          | PL512          | 02142008        | 0.690        | 10,11     | 9,10     | 8,12        | 10,11       | 16        | 6        | X,Y        | 8,9      | 11,12        |
| JCRB9088          | Dempsy         | 050487          | 0.690        | 11,13     | 11       | 8,12        | 11,12       | 17,18     | 8,9,3    | X,Y        | 8        | 11,12        |
| JCRB0117          | B104           | 07142009        | 0.667        | 11        | 10,11    | 12          | 9,11        | 16        | 7,8      | X,Y        | 8,11     | 12           |
| JCRB0314          | FA9JTO         | 05302008        | 0.667        | 12        | 9,12     | 11          | 9,11        | 14        | 9        | X,Y        | 8,11     | 11,12        |
| JCRB0330          | RBL182T        | 06072010        | 0.667        | 11,13     | 9        | 12          | 11          | 14,15     | 7        | X,Y        | 8,9      | 12,13        |
| JCRB1060          | FA9JTOTERT     | deposit         | 0.667        | 12        | 9,12     | 11          | 9,11        | 14        | 9        | X,Y        | 8,11     | 11,12        |
| <b>ST-0064-01</b> | <b>OKAJIMA</b> | <b>11202014</b> | <b>1.000</b> | <b>11</b> | <b>9</b> | <b>8,12</b> | <b>9,11</b> | <b>14</b> | <b>8</b> | <b>X,Y</b> | <b>8</b> | <b>11,12</b> |

## Summary (Cell No. : ST-0064\_01)

It was confirmed that the cell (Cell No.: ST-0064\_01, Cell Name: OKAJIMA) was not corresponding to the cell of the database of JCRB (Database of 2279 cells registered in ATCC, DSMZ, RIKEN CELL BANK, and JCRB).

## Peak report (Cell No. : ST-0064\_02)

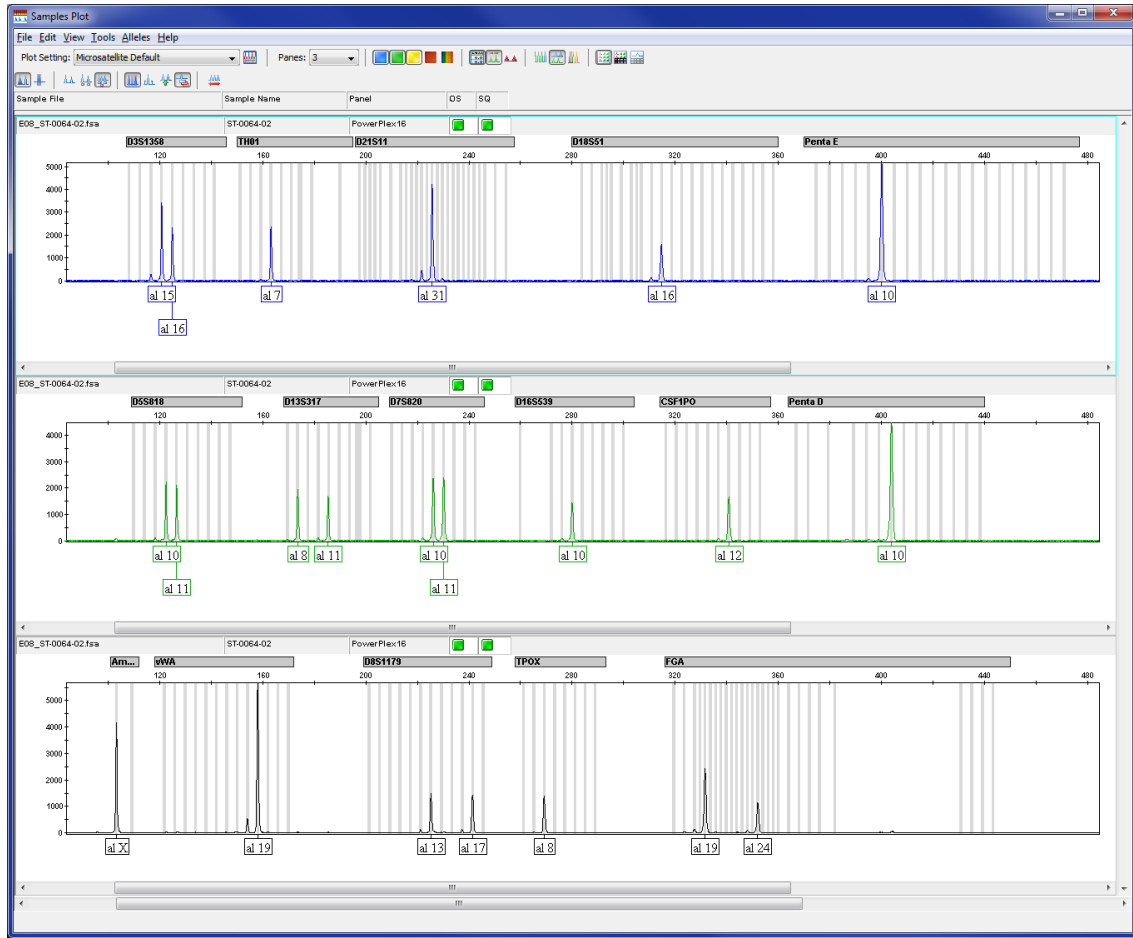

## STR Profile (Cell No. : ST-0064\_02)

| D3S1358 | TH01 | D21S11 | D18S51 | Penta_E |
|---------|------|--------|--------|---------|
| 15,16   | 7    | 31     | 16     | 10      |

| D5S818 | D13S317 | D7S820 | D16S539 | CSF1PO | Penta_D |
|--------|---------|--------|---------|--------|---------|
| 10,11  | 8,11    | 10,11  | 10      | 12     | 10      |

| AM | vWA | D8S1179 | TPOX | FGA   |
|----|-----|---------|------|-------|
| X  | 19  | 13,17   | 8    | 19,24 |

## Comparison with database (Cell No. : ST-0064\_02)

| Cell No.   | Cell Name | Lot No.  | EV    | D5S818 | D13S317  | D7S820 | D16S539 | vWA   | TH01 | AM  | TPOX | CSF1PO |
|------------|-----------|----------|-------|--------|----------|--------|---------|-------|------|-----|------|--------|
| ST-0064-02 | MKN45     | 11202014 | 1.000 | 10,11  | 8,11     | 10,11  | 10      | 19    | 7    | X   | 8    | 12     |
| RCB1001    | MKN45     | -----    | 1.000 | 10,11  | 8,11     | 10,11  | 10      | 19    | 7    | X   | 8    | 12     |
| JCRB0254   | MKN45     | 111795   | 1.000 | 10,11  | 8,11     | 10,11  | 10      | 19    | 7    | X   | 8    | 12     |
| JCRB1379   | MKN45-Luc | 10222010 | 1.000 | 10,11  | 8,11     | 10,11  | 10      | 19    | 7    | X   | 8    | 12     |
| JCRB1116   | Yub 10F   | 08192005 | 0.741 | 10     | 8,11     | 10,11  | 10,13   | 13,14 | 6,7  | X   | 8    | 11,12  |
| JCRB1034   | OUS-11    | 04122003 | 0.667 | 10,11  | 10,11    | 10,11  | 10      | 14,17 | 7    | X   | 8,11 | 10,11  |
| JCRB1405   | Minami-2  | 04212011 | 0.667 | 10,11  | 8,11     | 9,11   | 9,10    | 14,17 | 7,9  | X,Y | 8,11 | 10,12  |
| IFO50513   | MTA       | 924      | 0.643 | 10,11  | 11       | 10,11  | 9,12    | 18,19 | 6,7  | X   | 8,11 | 10,11  |
| JCRB0331   | AT(L)5KY  | 04212009 | 0.643 | 10,14  | 9,11     | 10,11  | 9,10    | 14,17 | 6,7  | X   | 8    | 11,12  |
| JCRB1030   | JHH-6     | 09082009 | 0.643 | 10,11  | 11,12,13 | 11     | 10      | 14,18 | 7,9  | X   | 8,9  | 10,12  |
| JCRB1170   | SKNO-1    | 08162006 | 0.643 | 10,13  | 8,11     | 10,12  | 10,11   | 14,17 | 7    | X   | 8,9  | 12,13  |
| ST-0064-02 | MKN45     | 11202014 | 1.000 | 10,11  | 8,11     | 10,11  | 10      | 19    | 7    | X   | 8    | 12     |

## Summary (Cell No. : ST-0064\_02)

It was confirmed that the cell (Cell No. : ST-0064\_02, Cell Name: MKN45) was the same as the cell registered in RIKEN CELL BANK (RCB1001 MKN45), and the cell registered in JCRB (JCRB0254 MKN45, JCRB1379 MKN45-Luc), by the comparison with the database of JCRB Cell Bank.

## Peak report (Cell No. : ST-0064\_03)

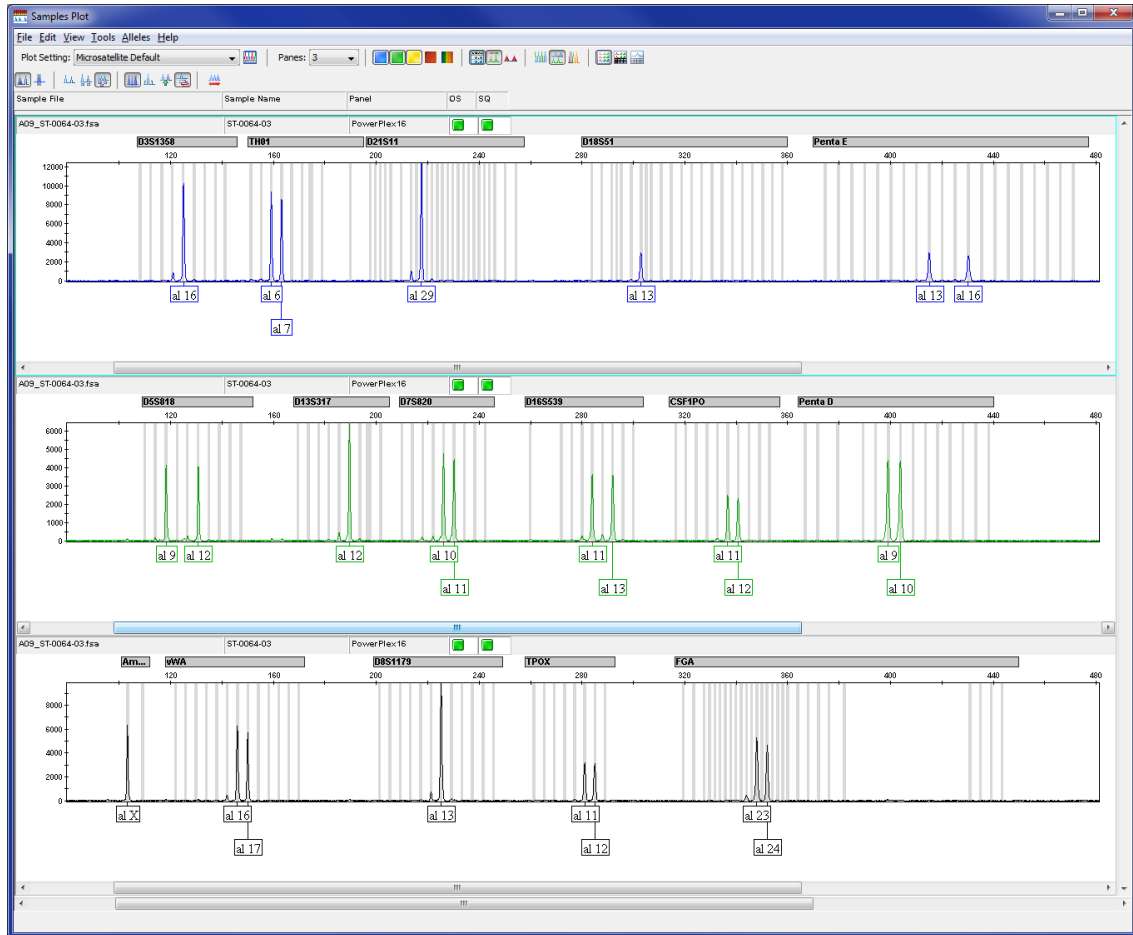

## STR Profile (Cell No. : ST-0064\_03)

|                |                |                |                |                |                |
|----------------|----------------|----------------|----------------|----------------|----------------|
| <b>D3S1358</b> | <b>TH01</b>    | <b>D21S11</b>  | <b>D18S51</b>  | <b>Penta_E</b> |                |
| 16             | 6,7            | 29             | 13             | 13,16          |                |
| <b>D5S818</b>  | <b>D13S317</b> | <b>D7S820</b>  | <b>D16S539</b> | <b>CSF1PO</b>  | <b>Penta_D</b> |
| 9,12           | 12             | 10,11          | 11,13          | 11,12          | 9,10           |
| <b>AM</b>      | <b>vWA</b>     | <b>D8S1179</b> | <b>TPOX</b>    | <b>FGA</b>     |                |
| X              | 16,17          | 13             | 11,12          | 23,24          |                |

## Comparison with database (Cell No. : ST-0064\_03)

| Cell No.   | Cell Name | Lot No.  | EV    | D5S818 | D13S317 | D7S820 | D16S539 | vWA      | TH01 | AM  | TPOX  | CSF1PO |
|------------|-----------|----------|-------|--------|---------|--------|---------|----------|------|-----|-------|--------|
| ST-0064-03 | AGS       | 11202014 | 1.000 | 9,12   | 12      | 10,11  | 11,13   | 16,17    | 6,7  | X   | 11,12 | 11,12  |
| COSS906790 | AGS       | -----    | 1.000 | 9,12   | 12      | 10,11  | 11,13   | 16,17    | 6,7  | X   | 11,12 | 11,12  |
| JCRB1093   | PSVK1     | 12202004 | 0.750 | 12,13  | 12      | 10,11  | 9,13    | 16       | 6,7  | X,Y | 8,11  | 11,12  |
| JCRB0106   | SCCH-26   | 032787   | 0.710 | 11,12  | 11,12   | 10     | 11,12   | 16       | 6,7  | X   | 8,11  | 11,12  |
| JCRB0260   | SAS       | 120798   | 0.688 | 9      | 10,12   | 11,12  | 12,13   | 10,14,17 | 6,7  | X   | 11,12 | 11     |
| JCRB1194   | PL508     | 04242007 | 0.688 | 12,13  | 9,12    | 10,11  | 11,13   | 14,17    | 7,9  | X   | 11    | 12,13  |
| JCRB3018   | BC-KP     | 07222014 | 0.688 | 9,11   | 8,12    | 8,10   | 11,13   | 14,17    | 6,7  | X   | 9,11  | 11     |
| CRL-2914   | M4A4      | atcc     | 0.667 | 11,12  | 12      | 8,10   | 13      | 16,18    | 6,7  | X   | 8,11  | 11     |
| JCRB0746   | YKG-1     | 062496   | 0.667 | 10,11  | 8,12    | 10,11  | 11      | 16,17    | 6,9  | X   | 11    | 12     |
| JCRB0185   | HCC-48    | 11162001 | 0.645 | 12     | 11      | 11     | 11,13   | 16,17,18 | 7,9  | X   | 8,11  | 12,13  |
| JCRB1090   | NCE 16IIA | 02182011 | 0.645 | 12     | 11,12   | 8,11   | 11,12   | 16,18    | 7    | X   | 9,12  | 11,12  |
| ST-0064-03 | AGS       | 11202014 | 1.000 | 9,12   | 12      | 10,11  | 11,13   | 16,17    | 6,7  | X   | 11,12 | 11,12  |

## Summary (Cell No. : ST-0064\_03)

It was confirmed that the cell (Cell No. : ST-0064\_03, Cell Name: AGS) was the same as the cell registered in COSMIC Cell Line Project (COSS906790 AGS), by the comparison with the database of JCRB Cell Bank.

## Peak report (Cell No. : ST-0064\_04)

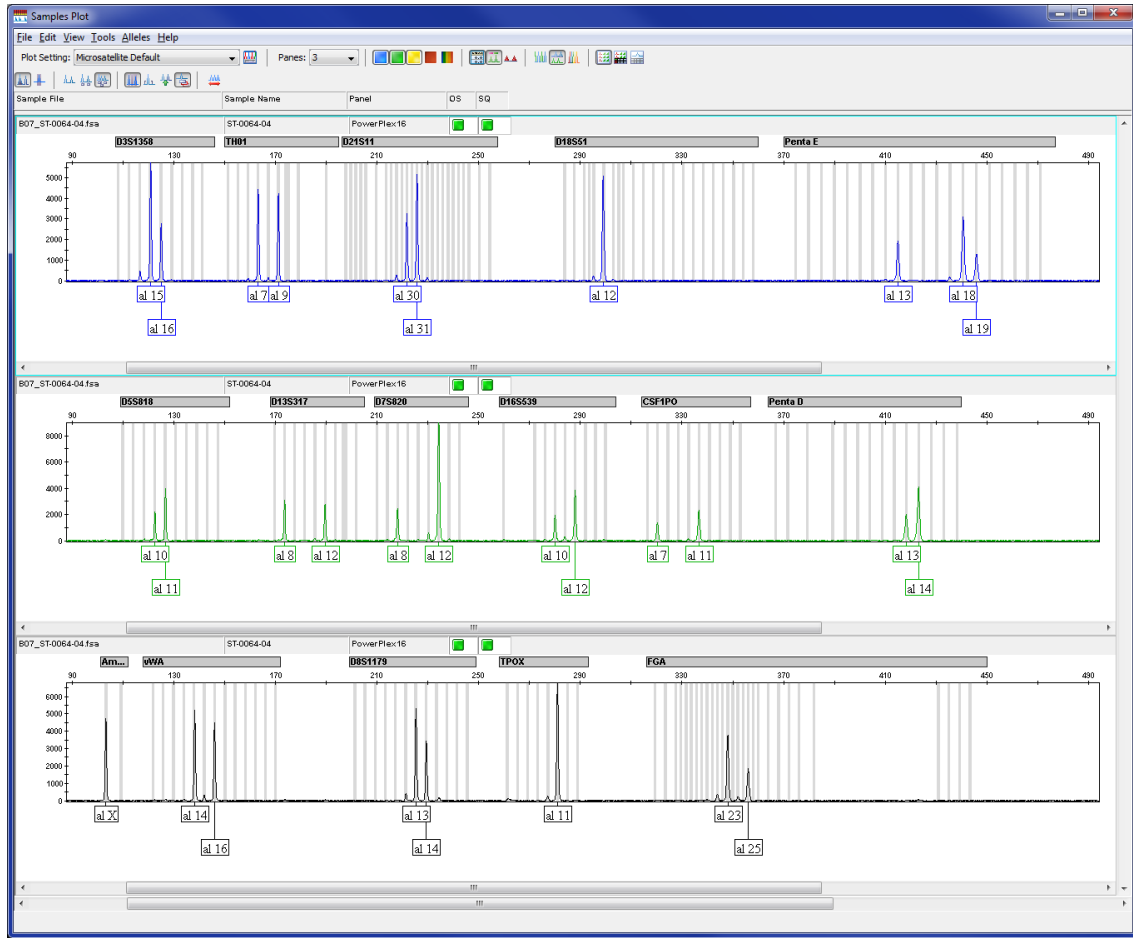

## STR Profile (Cell No. : ST-0064\_04)

|                |                |                |                |                |                |
|----------------|----------------|----------------|----------------|----------------|----------------|
| <b>D3S1358</b> | <b>TH01</b>    | <b>D21S11</b>  | <b>D18S51</b>  | <b>Penta_E</b> |                |
| 15,16          | 7,9            | 30,31          | 12             | 13,18,19       |                |
| <b>D5S818</b>  | <b>D13S317</b> | <b>D7S820</b>  | <b>D16S539</b> | <b>CSF1PO</b>  | <b>Penta_D</b> |
| 10,11          | 8,12           | 8,12           | 10,12          | 7,11           | 13,14          |
| <b>AM</b>      | <b>vWA</b>     | <b>D8S1179</b> | <b>TPOX</b>    | <b>FGA</b>     |                |
| X              | 14,16          | 13,14          | 11             | 23,25          |                |

## Comparison with database (Cell No. : ST-0064\_04)

| Cell No.   | Cell Name       | Lot No.  | EV    | D5S818 | D13S317 | D7S820 | D16S539 | vWA   | TH01 | AM  | TPOX  | CSF1PO |
|------------|-----------------|----------|-------|--------|---------|--------|---------|-------|------|-----|-------|--------|
| ST-0064-04 | KATO-III        | 11202014 | 1.000 | 10,11  | 8,12    | 8,12   | 10,12   | 14,16 | 7,9  | X   | 11    | 7,11   |
| HTB-103    | KATO III        | -----    | 1.000 | 10,11  | 8,12    | 8,12   | 10,12   | 14,16 | 7,9  | X   | 11    | 7,11   |
| RCB2088    | Kato III        | -----    | 1.000 | 10,11  | 8,12    | 8,12   | 10,12   | 14,16 | 7,9  | X   | 11    | 7,11   |
| JCRB0611   | KATOIII         | 082995   | 1.000 | 10,11  | 8,12    | 8,12   | 10,12   | 14,16 | 7,9  | X   | 11    | 7,11   |
| JCRB1487   | KATOIII/GMV-Luc | 09112012 | 1.000 | 10,11  | 8,12    | 8,12   | 10,12   | 14,16 | 7,9  | X   | 11    | 7,11   |
| JCRB1581   | Edom22          | 04142014 | 0.733 | 11     | 8,12    | 9,12   | 10,12   | 14,17 | 7,9  | X   | 11    | 12     |
| JCRB0301   | XP2OS(SV)       | 02152011 | 0.714 | 11     | 9       | 8,12   | 12      | 14,16 | 9    | X   | 11    | 10,11  |
| JCRB1317   | KCL-22          | 08152008 | 0.690 | 10,11  | 8,12    | 11,12  | 12      | 14    | 7,9  | X   | 8     | 12     |
| JCRB0525   | TIG-2M-30       | 07282011 | 0.688 | 11,13  | 8,12    | 12     | 11,12   | 14,16 | 7,9  | X   | 9,10  | 11,12  |
| JCRB0534   | TIG-114         | 09022011 | 0.688 | 10,11  | 8       | 9,11   | 9,10    | 14,16 | 7,9  | X,Y | 10,11 | 11     |
| JCRB1437   | iPS-TIG114-4f1  | 02152012 | 0.688 | 10,11  | 8       | 9,11   | 9,10    | 14,16 | 7,9  | X,Y | 10,11 | 11     |
| ST-0064-04 | KATO-III        | 11202014 | 1.000 | 10,11  | 8,12    | 8,12   | 10,12   | 14,16 | 7,9  | X   | 11    | 7,11   |



## Summary (Cell No. : ST-0064\_04)

It was confirmed that the cell (Cell No. : ST-0064\_04, Cell Name: KATO-III) was the same as the cell registered in ATCC (HTB-103 KATO III), the cell registered in RIKEN CELL BANK (RCB2088 Kato III), and the cell registered in JCRB (JCRB0611 KATOIII, JCRB1487 KATOIII/CMV-Luc), by the comparison with the database of JCRB Cell Bank.

## Peak report (Cell No. : ST-0064\_05)

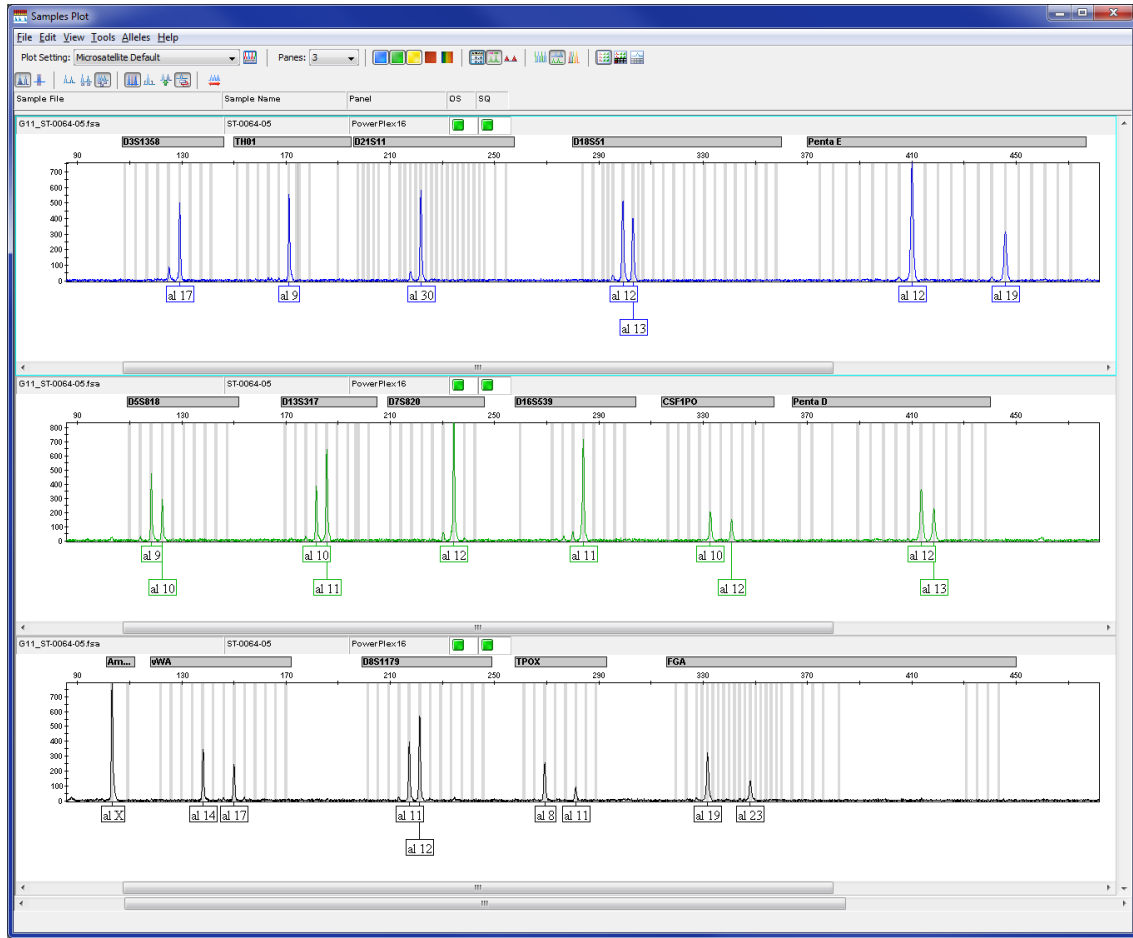

## STR Profile (Cell No. : ST-0064\_05)

|                |                |                |                |                |                |
|----------------|----------------|----------------|----------------|----------------|----------------|
| <b>D3S1358</b> | <b>TH01</b>    | <b>D21S11</b>  | <b>D18S51</b>  | <b>Penta_E</b> |                |
| 17             | 9              | 30             | 12,13          | 12,19          |                |
| <b>D5S818</b>  | <b>D13S317</b> | <b>D7S820</b>  | <b>D16S539</b> | <b>CSF1PO</b>  | <b>Penta_D</b> |
| 9,10           | 10,11          | 12             | 11             | 10,12          | 12,13          |
| <b>AM</b>      | <b>vWA</b>     | <b>D8S1179</b> | <b>TPOX</b>    | <b>FGA</b>     |                |
| X              | 14,17          | 11,12          | 8,11           | 19,23          |                |

## Comparison with database (Cell No. : ST-0064\_05)

| Cell No.   | Cell Name    | Lot No.  | EV    | D5S818        | D13S317   | D7S820  | D16S539     | vWA      | TH01 | AM  | TPOX | CSF1PO |
|------------|--------------|----------|-------|---------------|-----------|---------|-------------|----------|------|-----|------|--------|
| ST-0064-05 | OCUM-1       | 11202014 | 1.000 | 9,10          | 10,11     | 12      | 11          | 14,17    | 9    | X   | 8,11 | 10,12  |
| JCRB0192   | OCUM-1       | 01222002 | 0.966 | 9,10          | 10,11     | 12      | 11          | 14,16,17 | 9    | X   | 8,11 | 10,12  |
| JCRB1188   | KMS-27       | 03202007 | 0.733 | 10,12         | 10,11     | 11      | 11,12       | 14,17    | 6,9  | X,Y | 8    | 10,12  |
| JCRB1197   | PL509        | 06202007 | 0.733 | 9,10          | 9,11      | 11,12   | 11,12       | 14,17    | 6    | X,Y | 8    | 10,12  |
| JCRB1217   | MT-3         | 04012011 | 0.733 | 11            | 10,11     | 10,3,12 | 9,11        | 14,17    | 9    | X,Y | 8,9  | 10,12  |
| JCRB1308   | NCC-OvC-K119 | 11072008 | 0.720 | 9             | 8         | 12,13   | 11          | 14       | 9    | X   | 8,11 | 10     |
| IFO50434   | KALS-1       | 918      | 0.692 | 9             | 10        | 10,12   | 11,13       | 14,17    | 9    | X   | 8    | 9      |
| JCRB1576   | Onda 9       | 03122014 | 0.690 | 9,12          | 11        | 12      | 11,13       | 14,18    | 9    | X,Y | 8,9  | 10,12  |
| JCRB1583   | Onda 9R      | 04212014 | 0.690 | 9,12          | 11        | 12      | 11,13       | 14,18    | 9    | X,Y | 8,9  | 10,12  |
| JCRB1607   | Onda 9R-E12  | 09182014 | 0.690 | 9,12          | 11        | 12      | 11,13       | 14,18    | 9    | X,Y | 8,9  | 10,12  |
| JCRB0105.1 | KY821 A3     | 032087   | 0.667 | 9,10,11,12,13 | 8,9,11,12 | 11,12   | 10,11,12,13 | 14,17,18 | 7,9  | X   | 8,11 | 10,12  |
| ST-0064-05 | OCUM-1       | 11202014 | 1.000 | 9,10          | 10,11     | 12      | 11          | 14,17    | 9    | X   | 8,11 | 10,12  |

## Summary (Cell No. : ST-0064\_05)

It was confirmed that the cell (Cell No. : ST-0064\_05, Cell Name: OCUM-1) was the same as the cell registered in JCRB (JCRB0192 OCUM-1), by the comparison with the database of JCRB Cell Bank.

# Peak report (Cell No. : ST-0064\_06)

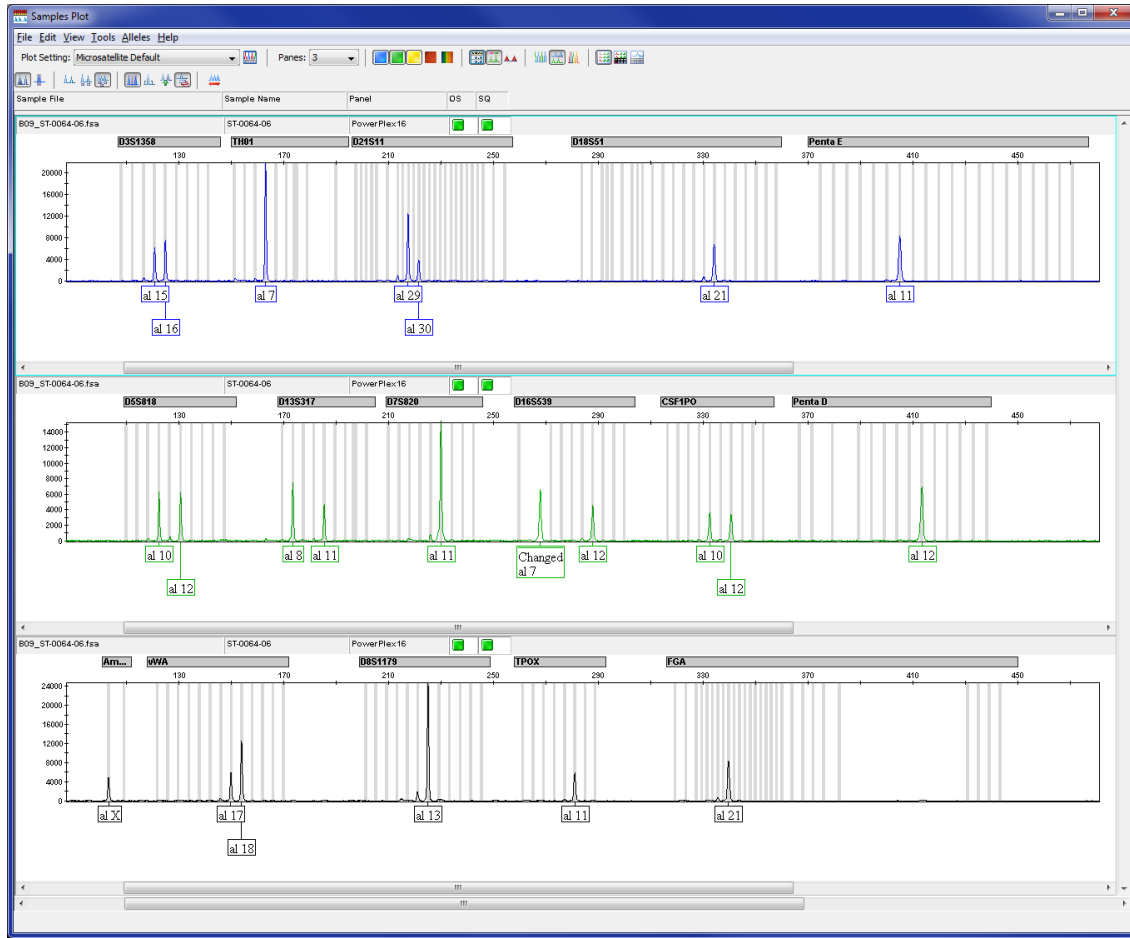

## STR Profile (Cell No. : ST-0064\_06)

|                |                |                |                |                |                |
|----------------|----------------|----------------|----------------|----------------|----------------|
| <b>D3S1358</b> | <b>TH01</b>    | <b>D21S11</b>  | <b>D18S51</b>  | <b>Penta_E</b> |                |
| 15,16          | 7              | 29,30          | 21             | 11             |                |
| <b>D5S818</b>  | <b>D13S317</b> | <b>D7S820</b>  | <b>D16S539</b> | <b>CSF1PO</b>  | <b>Penta_D</b> |
| 10,12          | 8,11           | 11             | 7,12           | 10,12          | 12             |
| <b>AM</b>      | <b>vWA</b>     | <b>D8S1179</b> | <b>TPOX</b>    | <b>FGA</b>     |                |
| X              | 17,18          | 13             | 11             | 21             |                |

## Comparison with database (Cell No. : ST-0064\_06)

| Cell No.          | Cell Name     | Lot No.         | EV           | D5S818        | D13S317     | D7S820    | D16S539     | vWA          | TH01     | AM       | TPOX      | CSF1PO       |
|-------------------|---------------|-----------------|--------------|---------------|-------------|-----------|-------------|--------------|----------|----------|-----------|--------------|
| <b>ST-0064-06</b> | <b>NUGC-2</b> | <b>11202014</b> | <b>1.000</b> | <b>10,12</b>  | <b>8,11</b> | <b>11</b> | <b>7,12</b> | <b>17,18</b> | <b>7</b> | <b>X</b> | <b>11</b> | <b>10,12</b> |
| JCRB0821          | NUGC-2        | 100496          | 1.000        | 10,12         | 8,11        | 11        | 7,12        | 17,18        | 7        | X        | 11        | 10,12        |
| IFO50413          | KP-N-YN       | 896             | 0.710        | 10,11         | 8,11        | 11,13     | 12          | 14,17        | 7,9      | X,Y      | 8,11      | 10,12        |
| JCRB1325          | MKPL-1        | 11182008        | 0.690        | 11,12         | 8,11        | 11        | 9           | 17,18        | 8,9,3    | X        | 10,11     | 10,12        |
| IFO50315          | RMG-I         | 712             | 0.667        | 12            | 8,12        | 11        | 9,10        | 17,18        | 6,7      | X        | 11        | 10           |
| IFO50316          | RMG-II        | 729             | 0.667        | 12            | 8,12        | 11        | 9,10        | 17,18        | 6,7      | X        | 11        | 10           |
| JCRB0042          | HEC-1         | 08112010        | 0.667        | 11,13         | 11          | 11        | 11,12       | 18           | 6,7      | X        | 11        | 10,12        |
| JCRB0105.1        | KY821A3       | 032087          | 0.667        | 9,10,11,12,13 | 8,9,11,12   | 11,12     | 10,11,12,13 | 14,17,18     | 7,9      | X        | 8,11      | 10,12        |
| JCRB0118          | SKM-1         | 042099          | 0.667        | 10,12         | 11,13       | 10,11     | 9,11        | 18           | 7,9      | X        | 8,11      | 10,12        |
| JCRB0326          | XP39OS        | 04222011        | 0.667        | 11,12         | 9,11        | 11,12     | 10,12       | 17,18        | 6,7      | X        | 8,11      | 12           |
| JCRB1057          | XP39OSTERT    | deposit         | 0.667        | 11,12         | 9,11        | 11,12     | 10,12       | 17,18        | 6,7      | X        | 8,11      | 12           |
| <b>ST-0064-06</b> | <b>NUGC-2</b> | <b>11202014</b> | <b>1.000</b> | <b>10,12</b>  | <b>8,11</b> | <b>11</b> | <b>7,12</b> | <b>17,18</b> | <b>7</b> | <b>X</b> | <b>11</b> | <b>10,12</b> |

## Summary (Cell No. : ST-0064\_06)

It was confirmed that the cell (Cell No. : ST-0064\_06, Cell Name: NUGC-2) was the same as the cell registered in JCRB (JCRB0821 NUGC-2), by the comparison with the database of JCRB Cell Bank.
